# Supplementary material for: Depletion of HuR in murine skeletal muscle enhances exercise endurance and prevents cancer-induced muscle atrophy
Source: PubMed Central journal article supplement (PMC6744452; doi:10.1038/s41467-019-12186-6), 2019-09-13
Supplement: 41467_2019_12186_MOESM1_ESM.pdf [file 41467_2019_12186_MOESM1_ESM.pdf]

# **Depletion of HuR in murine skeletal muscle enhances exercise endurance and prevents cancer-induced muscle atrophy**

Sánchez et al.

## **Supplementary Information**

This file contains Supplementary Figures 1-10 with figure legends, Supplementary Tables 1 and 2 (the primer list) and Information regarding the RNAseq data presented in Supplementary Data 1 (Excel file).

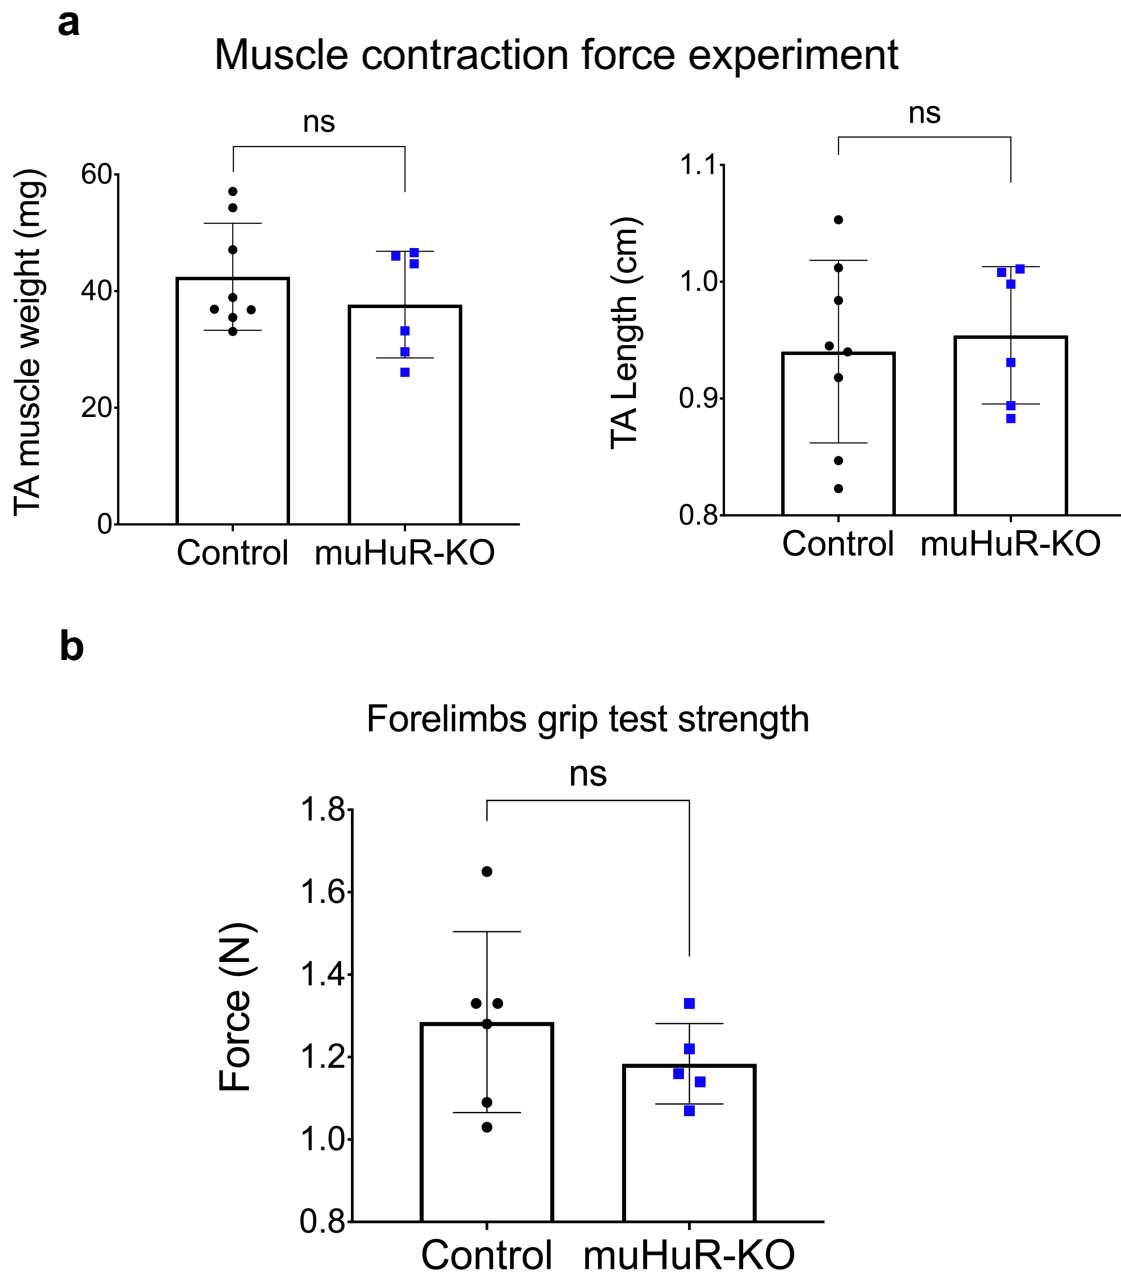

**Supplementary Figure 1** HuR muscle specific KO mice exhibit a decrease in muscle contraction strength. **a** Fatigability in Fig. 2a was normalized to TA muscle weight (**Left panel**) and length (**Right panel**). **b** Grip strength was evaluated on age-matched control and muHuR-KO mice using a digital force gauge. Peak force (N) was measured from forelimbs in 2 sessions. Each session consisted of triplicate measurements taken during 3 consecutive days. 4 days of resting were allowed in between sessions. The results are presented as mean  $\pm$  S.E.M, unpaired t-test. (**a**, control n=8 and muHuR-KO n=6), (**b**, control n=6 and muHuR-KO n=5). Source Data are provided in the Source Data File.

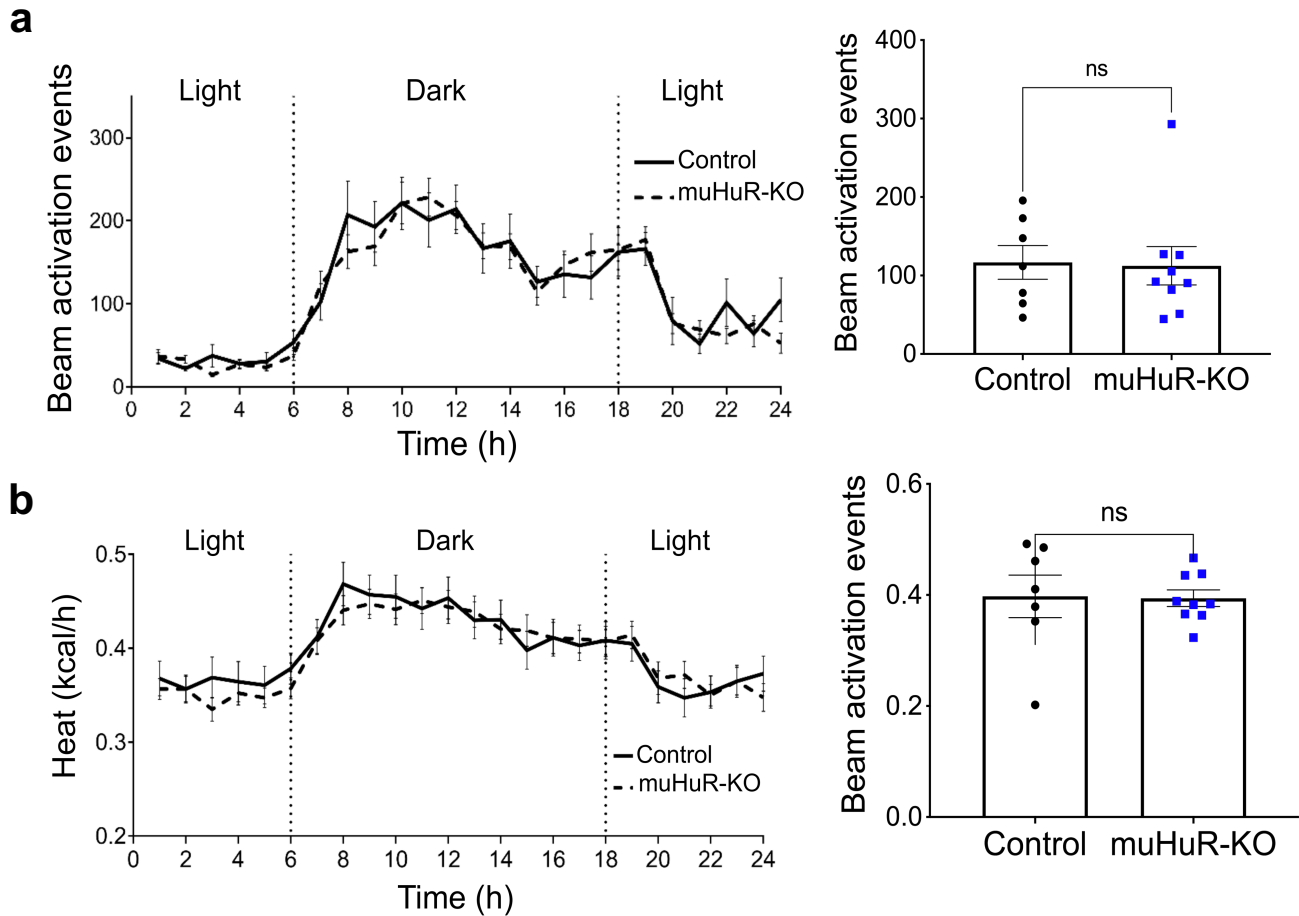

**Supplementary Figure 2** muHuR-KO mice display no significant difference in heat production (Energy expenditure) or ambulatory activity when compared to control littermates. **a-b** A Comprehensive Animal Monitoring System (CLAMS; Columbus Instruments, Columbus, OH) was used for a 3-day indirect calorimetry study in age-matched mice under a 12h light–12h dark cycle. **(b)** Heat production was calculated using the following equation:  $((3.82 + 1.23 \times \text{RER}) \times \text{VO}_2)$ . **(a) (Left panel)** Ambulatory activity was estimated by the number of infrared beam breaks along the x-axis of the metabolic cage. **(Right panel)** Mean values of beam activation events during 72h in control and muHuR-KO mice. **(b) (Left panel)** Graph depicting the average values at each time point. **(Right panel)** Mean values of heat production during 72h in control and muHuR-KO mice. Data was analyzed using CLAMS examination tool (CLAX; Columbus Instruments) version 2.1.0 (**a** and **b** right panels, Control: n=7, muHuR-KO: n=9). The results are presented as mean  $\pm$  S.E.M, \*p < 0.05 unpaired t-test. Source Data are provided in the Source Data File.

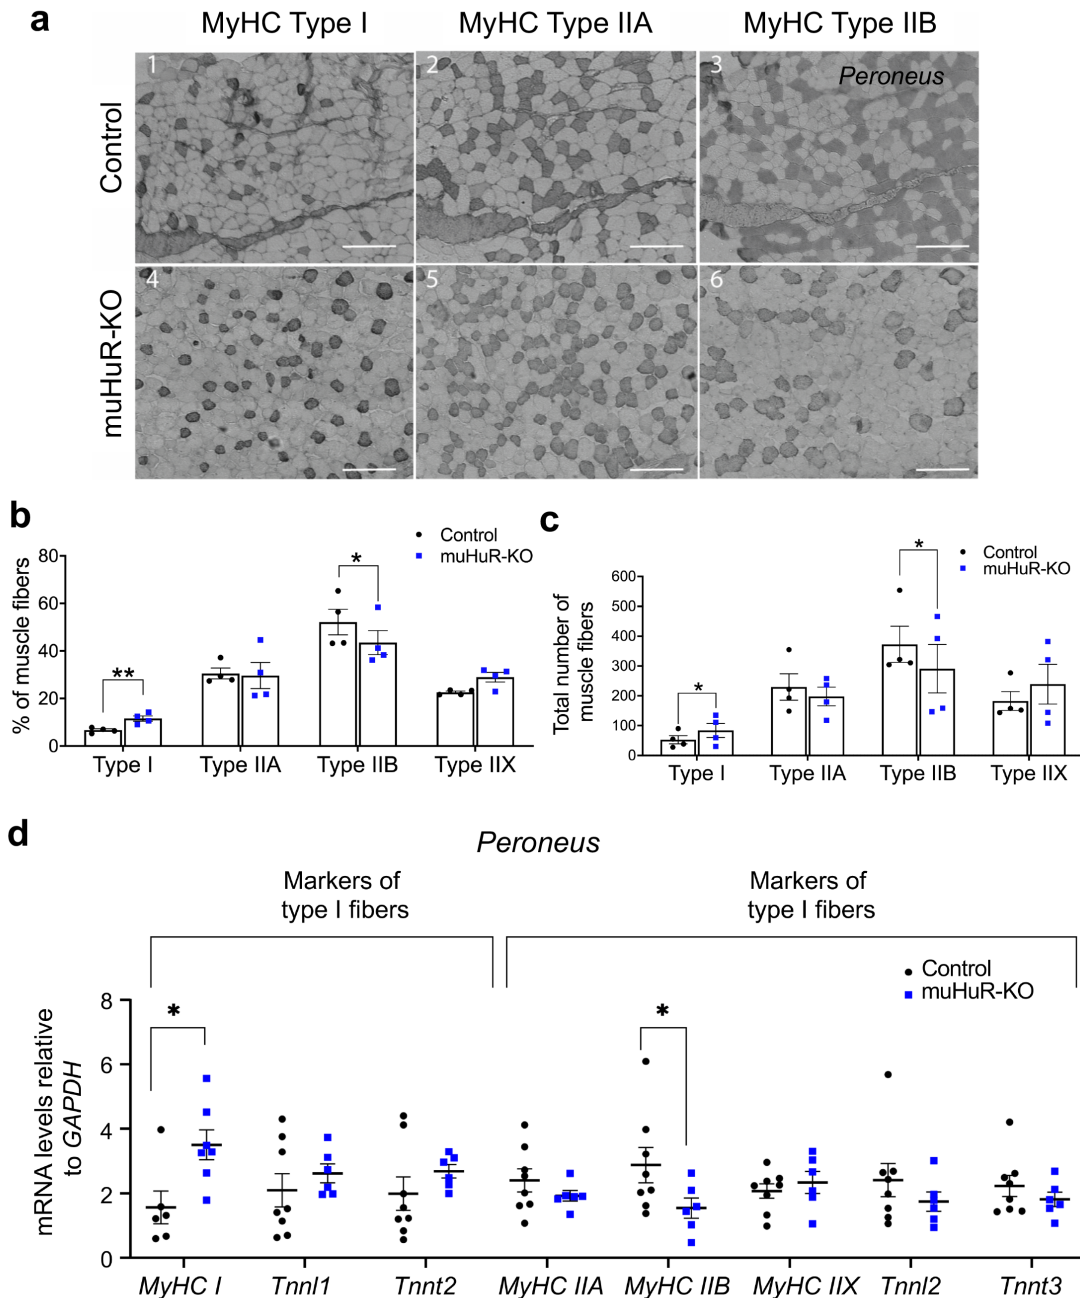

**Supplementary Figure 3** Depletion of HuR in skeletal muscle increases the proportion of type I fibers in *peroneus* muscle. **a** Representative photomicrographs of serial sections of *peroneus* muscle from control and muHuR-KO mice taken after immunostaining with anti-Myosin Heavy Chain (MyHC) antibodies type I, type II A and type II B. scale bars: 100 $\mu$ m. **b-c** Quantification of muscle fibers type I, type II A, and type II B, was ascertained manually. Fibers type II X were calculated by counting the unstained fibers. Results are graphed as the percentage (%) of the total number of fibers per muscle (**b**) and absolute total number of fibers per muscle (**c**) (n=4 mice). **d** mRNA expression of known markers of fiber type specificity (*Tnn1*, *Tnn1*, *Tnnt2*, *Tnnt3*, *MyHC I*, *MyHC II A*, *MyHC II B*, *MyHC II X*) was assessed by RT-qPCR. mRNA levels were standardized against *GAPDH* and plotted relative to the expression in control mice (muHuR-KO n=6 expect for *MyHC I* where n=7), (Control n=8, except for *MyHC I* where n=6). Source Data are provided in the Source Data File.

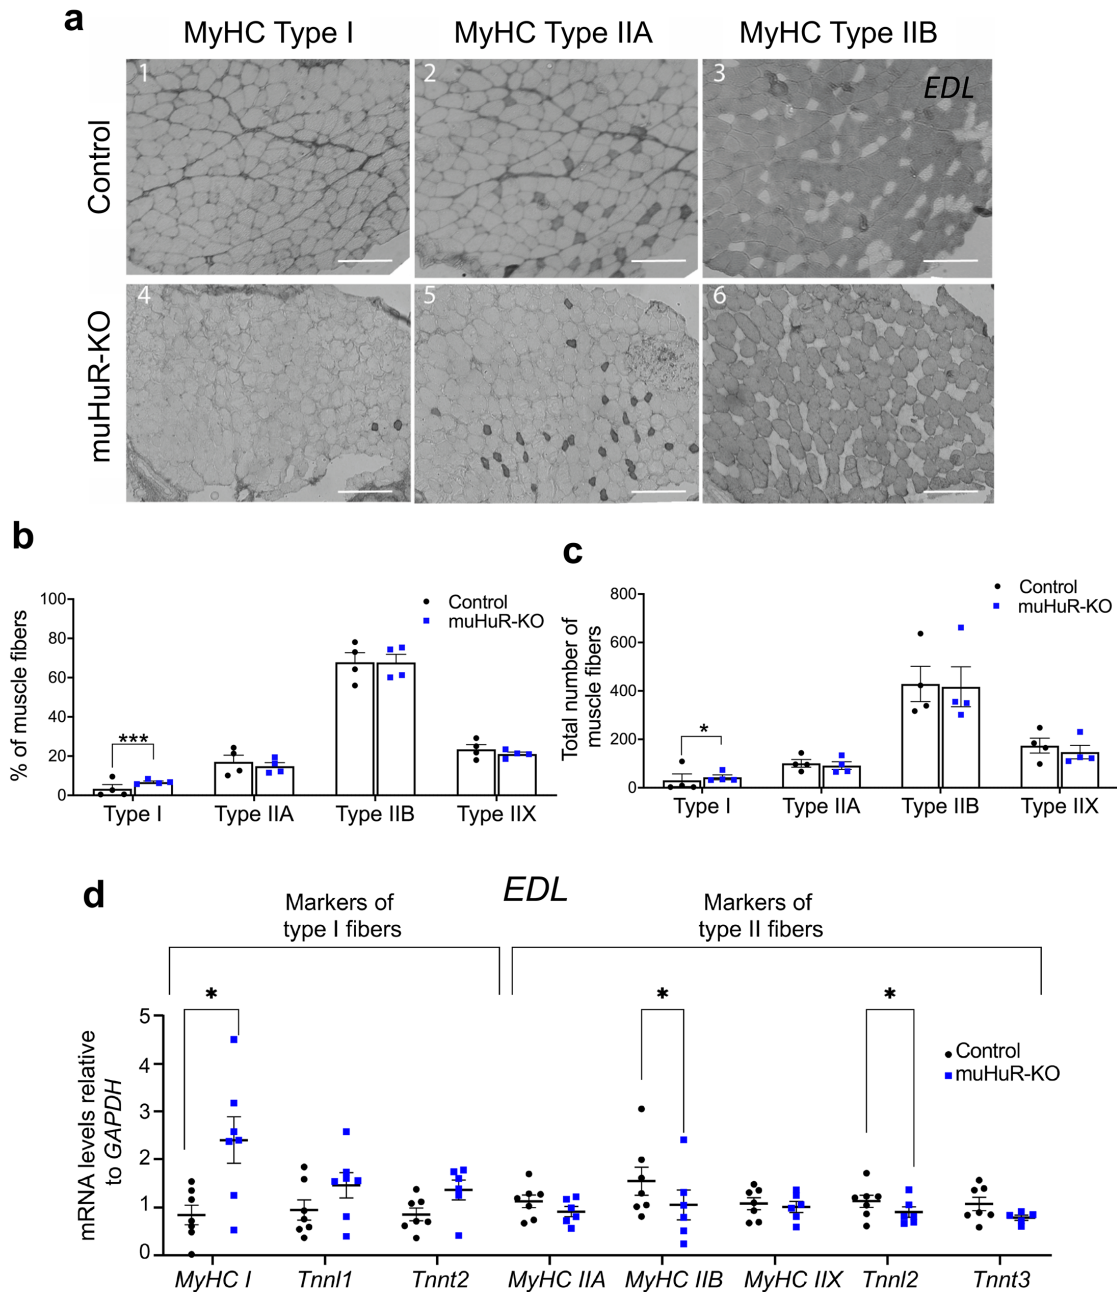

**Supplementary Figure 4** Depletion of HuR in skeletal muscle increases the proportion of type I fibers in EDL muscle. **a** Representative photomicrographs of serial sections from of EDL muscle from control and muHuR-KO mice taken after immunostaining with anti-Myosin Heavy Chain (MyHC) antibodies type I, type IIA and type IIB. Scale bars: 100 $\mu$ m. **b-c** Quantification of muscle fibers type I, type IIA, and type IIB, was ascertained manually. Fibers type IIX were calculated by counting the unstained fibers. Results are graphed as percentage (%) of the total number of fibers per muscle (**b**) and total number of fibers per muscle (**c**) (n=4 mice). **d** mRNA expression of known markers of fiber type specificity (*TnnI1*, *TnnI2*, *Tnnt1*, *Tnnt3*, *MyHC I*, *MyHC IIA*, *MyHC IIB*, *MyHC IIX*) was assessed by RT-qPCR. mRNA levels were standardized against *GAPDH* and plotted relative to the expression in control mice. (muHuR-KO n=6 except for *MyHCI* n=5, *TnnI1* and *Tnnt2* n=7), (Control n=7, except for *MyHCI* where n=8). Source Data are provided in the Source Data File.

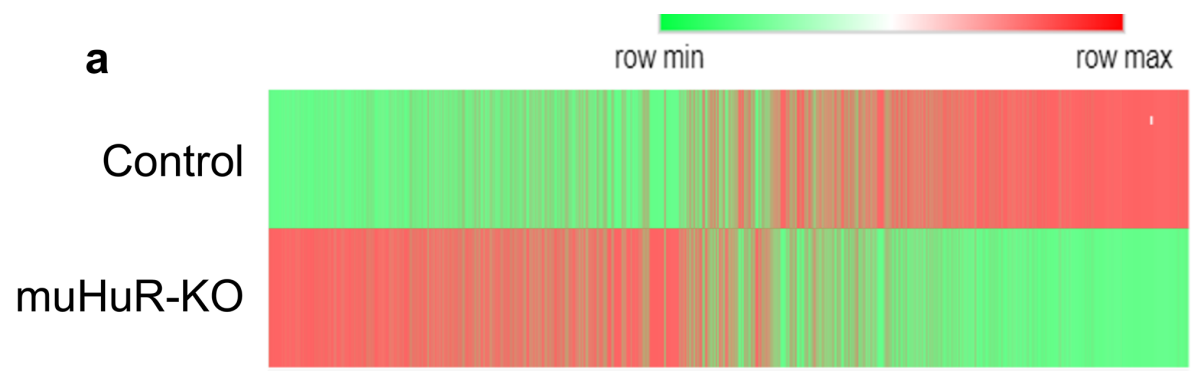

**b**

- 1.- Cardiac Hypertrophy
- 2.- PPAR $\alpha$ /RXR $\alpha$  Activation
- 3.- Cardiac Fibrosis
- 4.- Mechanism of Gene Regulation by Peroxisome Proliferator via PPAR $\alpha$
- 5.-Renal Necrosis/Cell Death
- 6.-Cardiac Necrosis/Cell Death
- 7.- Liver Necrosis/Cell Death
- 8.- p53 Signaling
- 9.- NRF2-mediated Oxidative stress Response
- 10.-TR/RXR Activation
- 11.-Liver Proliferation
- 12.-Aryl Hydrocarbon Receptor Signaling
- 13.-Hypoxia-Inducible Factor Signaling
- 14.-Increase Cardiac Proliferation
- 15.-TGF- $\beta$  Signaling

Differentially expressed genes within each canonical pathway

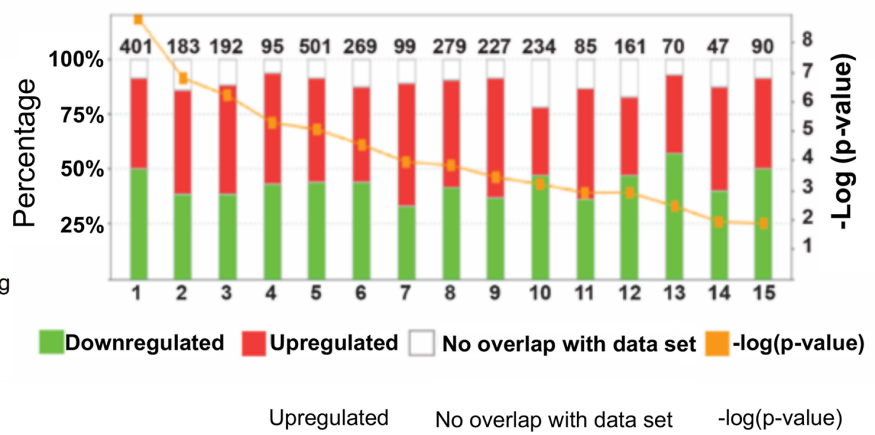

**Supplementary Figure 5** Heat Map and IPA analysis of RNAseq data. **a** Heat map analysis of RNA-seq data depicting the changes of gene expression in muHuR-KO mice *soleus* muscles. All transcripts with normalized read counts >0 across all samples were selected for *in silico* analysis and used as input into the website Morpheus to generate a heat map according to the instruction. **b** Differential expression in signaling pathways as analyzed by IPA®. Percentage of genes down-regulated (green), up-regulated (red) or not represented in our data set (white) are shown in the left Y-axis. The total number of genes found within each pathway are shown above each bar graph. The right Y-axis, represented by the orange points, shows the  $-\log p$  value for each pathway. Raw data for RNAseq are provided in Supplementary Table 2.

**a** *Peroneus*

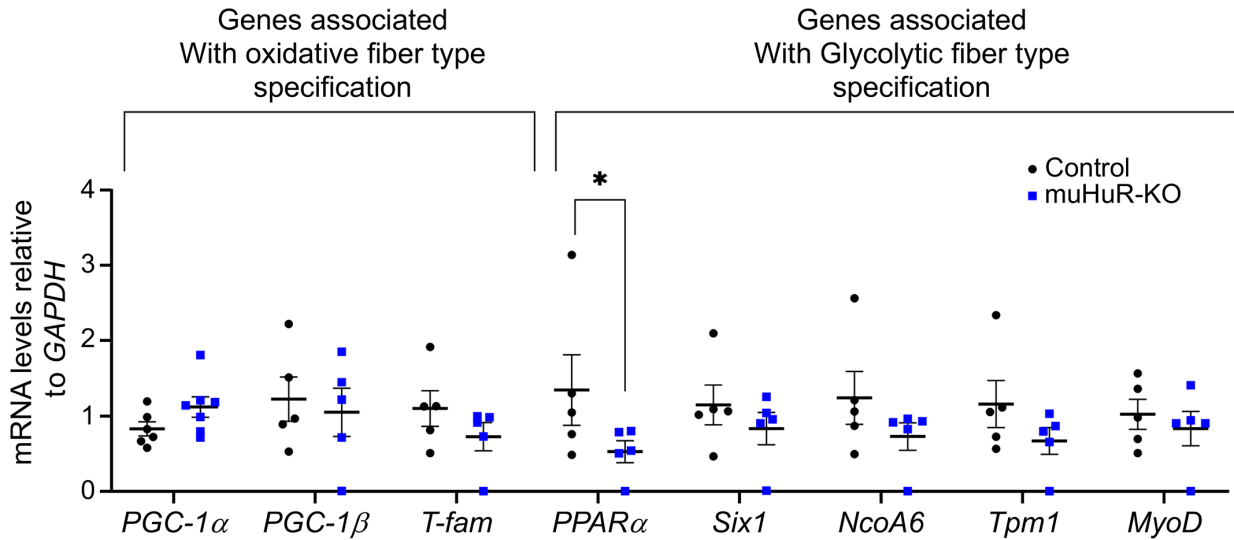

**b**

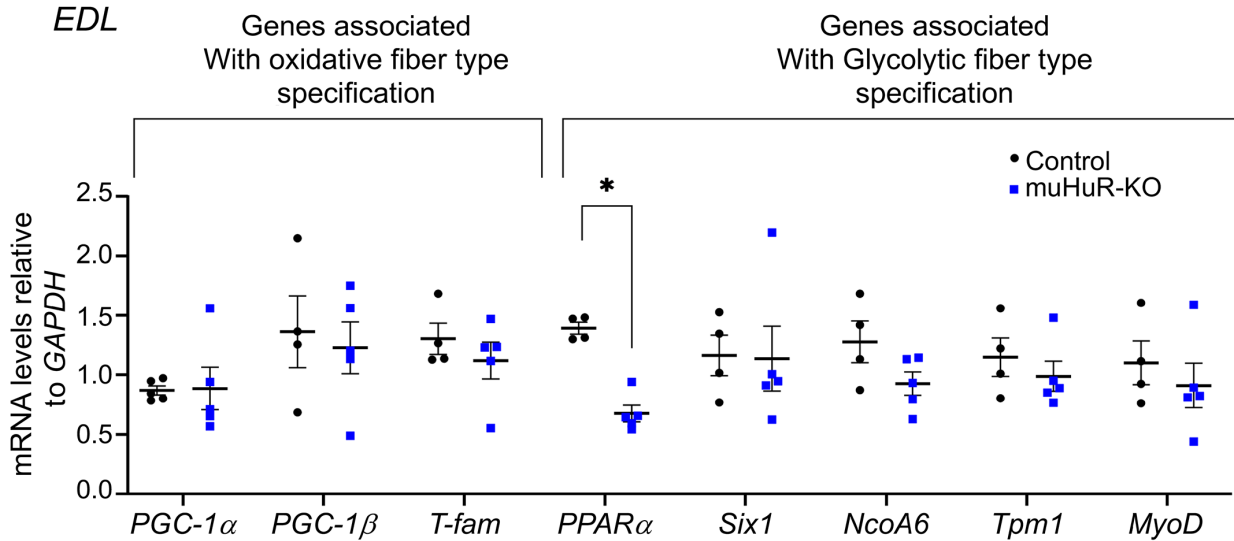

**Supplementary Figure 6** HuR differentially affects the expression of mRNAs associated to metabolism in *peroneus* and EDL muscles. **a-b** Total RNA was isolated from *peroneus* (**a**) or EDL muscles (**b**) of control and muHuR-KO mice and relative expression level of genes associated to PPAR signaling and/or fiber type specification (*PGC-1 $\alpha$* , *PGC-1 $\beta$* , *Tfam*, *PPAR $\alpha$* , *Six1*, *Tpm1*, *NCOA6*, *MyoD*) was assessed by RT-qPCR. Relative mRNA levels were standardized against *GAPDH* and plotted relatively to the expression in control mice (muHuR-KO n=6, (Control n=4, except for *PGC-1 $\alpha$*  where n=5). The results are presented as mean  $\pm$  S.E.M, \*p < 0.05, \*\*p < 0.005 unpaired t-test. Source Data are provided in the Source Data File.

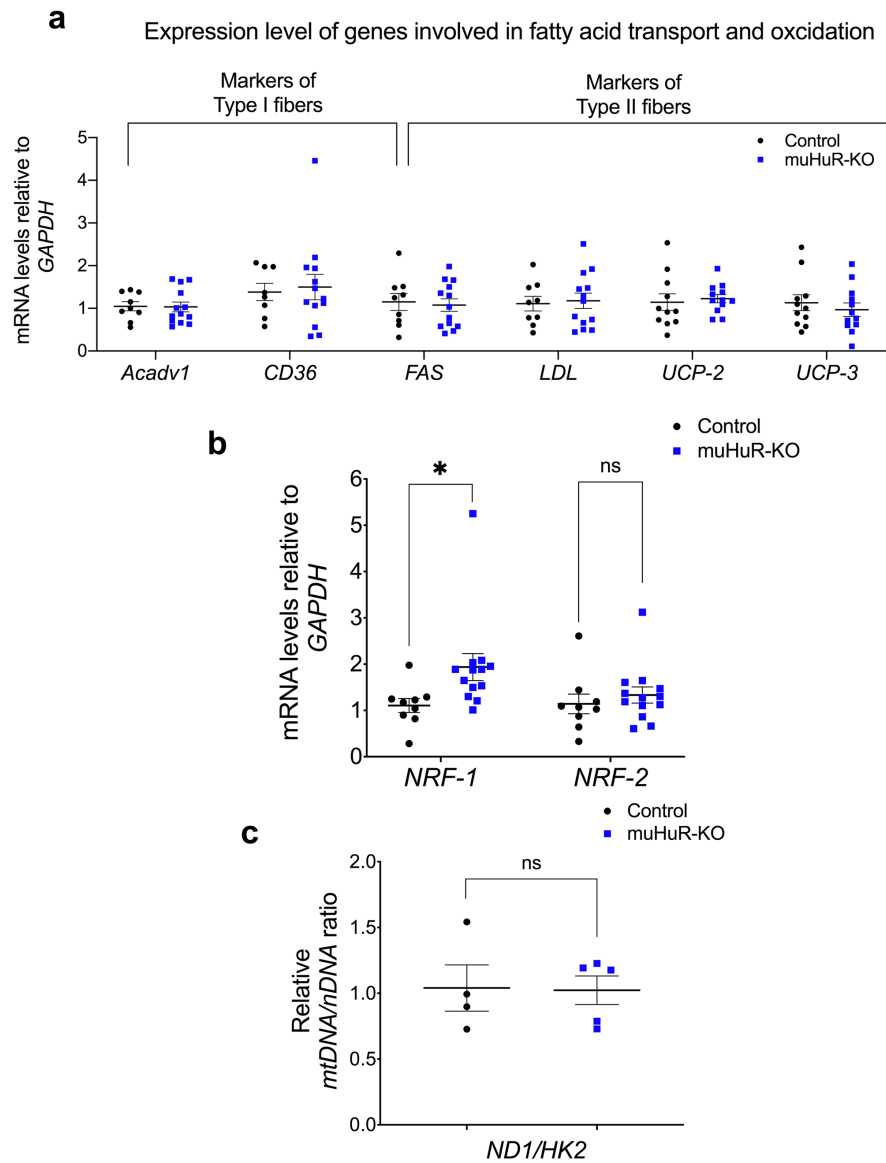

**Supplementary Figure 7** Effect of HuR depletion in lipid metabolism and oxidative phosphorylation. **a-b** Total RNA was isolated from *soleus* muscles from control and muHuR-KO mice and relative expression of genes involved in (a) fatty acid transporters and oxidation [*Acadv1* (control n=9, muHuR-KO n=12), *CD36* (control n=8, muHuR-KO n=13), *FAS* (control n=9, muHuR-KO n=13), *LDL* (control n=9, muHuR-KO n=12), *UCP-2* and *UCP-3* (control n=11, muHuR-KO n=13)] and (b) mitochondrial biogenesis [*NRF-1*, *NRF-2* (control n=9, muHuR-KO n=13)] was assessed by RT-qPCR in *soleus* muscles of Ctl and muHuR-KO mice. mRNA levels were standardized against *GAPDH* and plotted relatively to control animals. **c** DNA extracted from *gastrocnemius* muscle was used to determine the mtDNA/nDNA ratio. Expression levels were standardized against Hexokinase 2 (HK2) and plotted relatively to control animals (control n=4, muHuR-KO n=5). The results are presented as mean  $\pm$  S.E.M, \* $p < 0.05$  unpaired t-test. Source Data are provided in the Source Data File.



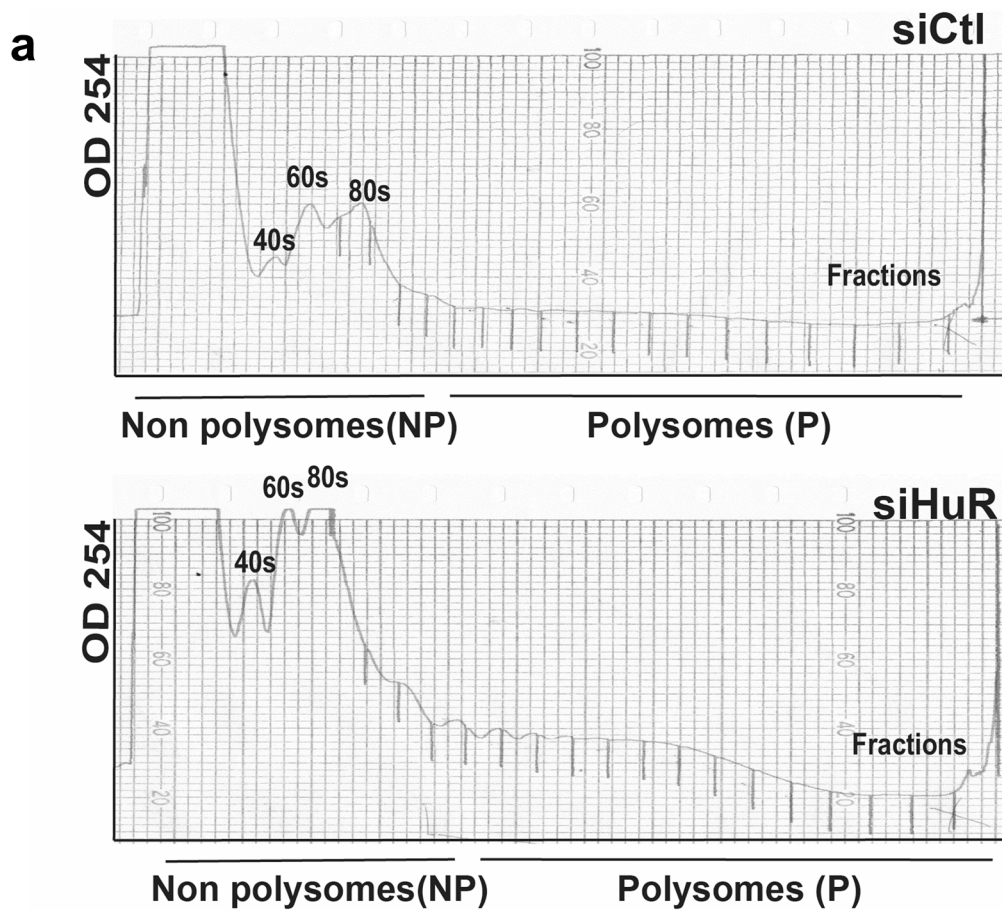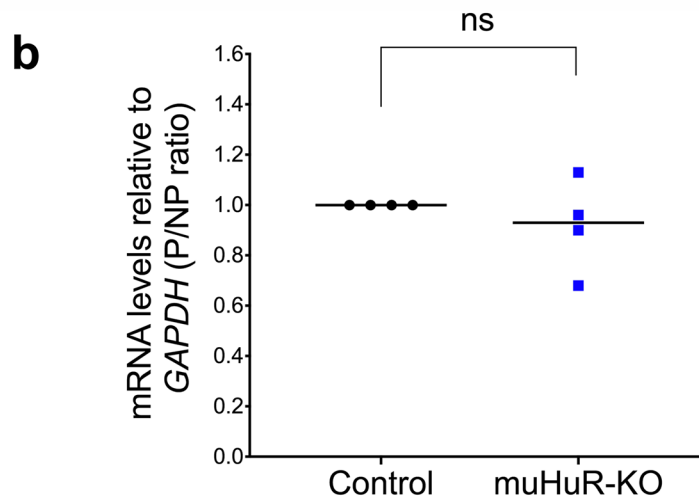

**Supplementary Figure 8** HuR does not regulate the translation of PGC-1 $\alpha$  mRNA. Cytoplasmic extracts obtained from C2C12 myoblasts treated with or without siHuR were prepared and fractionated on sucrose gradients (15–50% w/v). **a** Fractions were divided into two groups; non-polysome (NP, fractions 1–6) and polysome (P, fractions 7–20). **b** The level of PGC-1 $\alpha$  and GAPDH mRNAs in the Polysome and Non-Polysome were quantified by RT-qPCR using the  $\Delta\Delta C_t$  method and plotted as a Polysome to Non-Polysome ratio (n=4). The results are presented as mean  $\pm$  S.E.M, \*p < 0.05 unpaired t-test. Source Data are provided in the Source Data File.

## mRNA stability of genes associated to oxidative fiber type specification

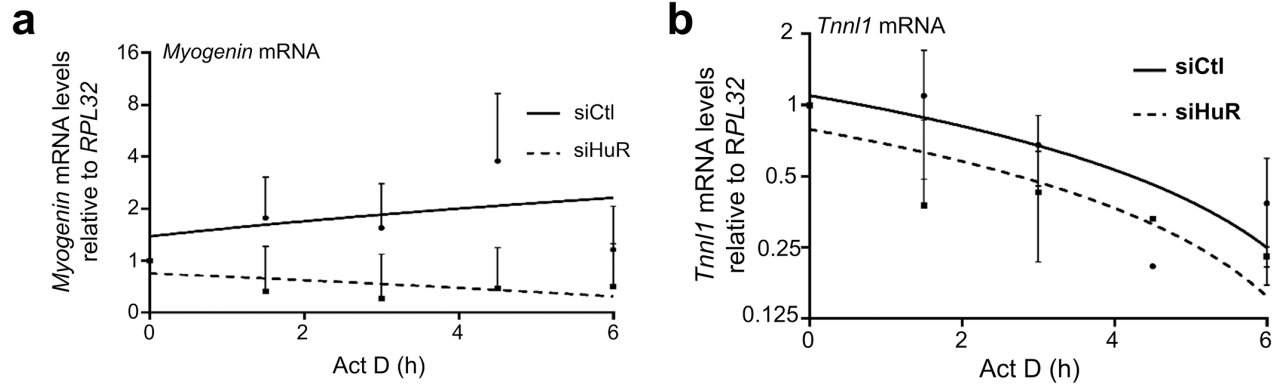

## mRNA stability of genes associated to glycolytic fiber type specification

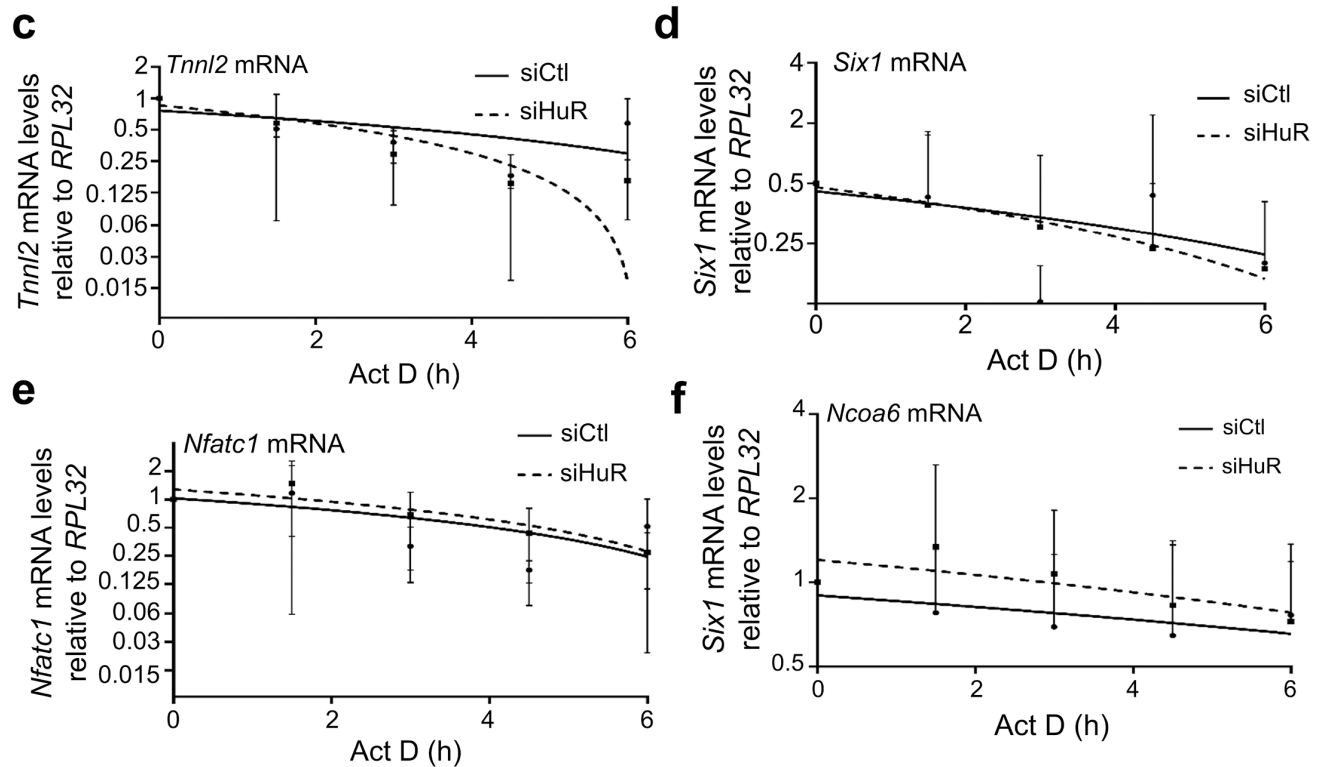

**Supplementary Figure 9** HuR differentially affects the stability of mRNAs associated to fiber type specification. **a-f** C2C12 myoblasts treated with or without siHuR were used to assess the stability of *Myogenin* (**a**), *Tnni1* (**b**), *Tnni2* (**c**), *Six1* (**d**), *NFATc1* (**e**) and *NCOA6* (**f**) mRNAs. Cells were treated with actinomycin D (ActD) for 0, 1.5, 3, 4.5 or 6 hours and mRNA from the different time points was processed by RT-qPCR. mRNA levels of the genes of interest were standardized against *RPL32* mRNA levels and plotted as a percent of the abundance of mRNA at time 0 of ActD treatment, which is considered as 1 ( $n=3$ , except for *Tnni1* where  $n=2$ ). The line of best fit was determined by linear regression using the data points for siCtl and siHuR. Error bars represent  $\pm$  S.E.M. Source Data are provided in the Source Data File.

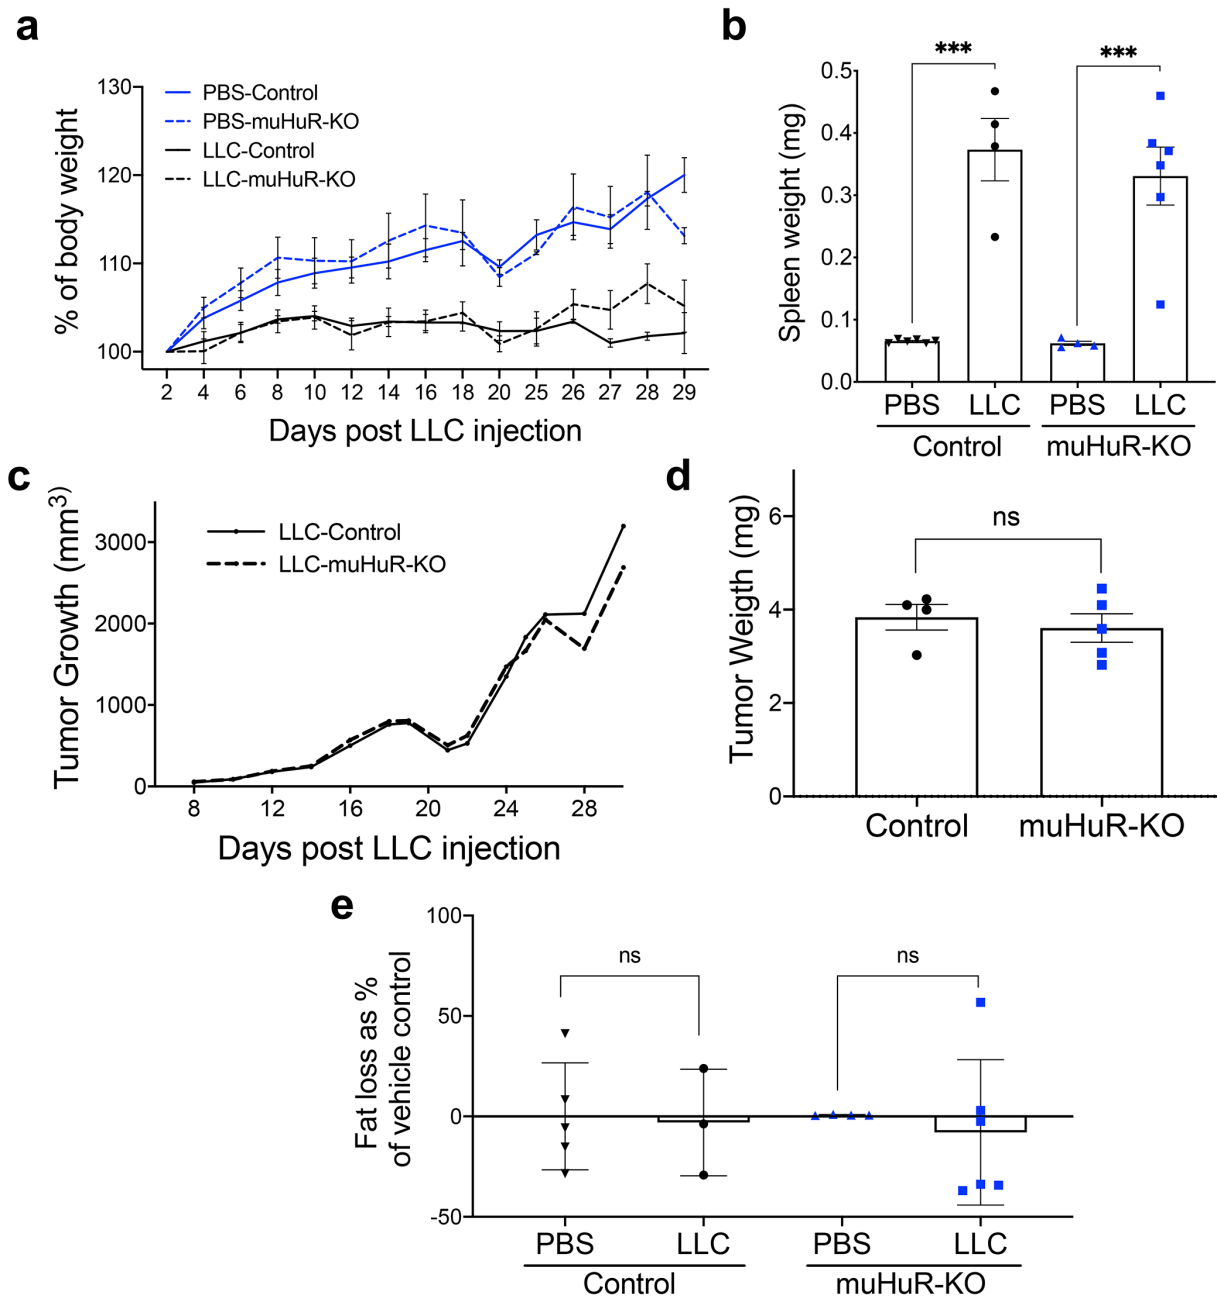

**Supplementary Figure 10** Validation of the LLC model in control and muHuR-KO mice. **a-e** Control and muHuR-KO mice were inoculated subcutaneously in their right flank with LLC cells or PBS and evaluated 29 days after inoculation by measuring **(a)** total body weight gain (LLC-Control n=4, LLC-muHuR-KO n=5), **(b)** sign of inflammation (spleen weight) (LLC-Control and PBS-muHuR n=4, PBS-Control and PBS-Control and LLC-muHuR-KO n=6), **(c)** tumor growth progression (n=5 except for LLC-Control where n=4), **(d)** tumor burden (LLC-Control n=4, and LLC-muHuR-KO n=5), **(e)** hindlimb fat pad loss (LLC-Control and PBS-muHuR n=4, PBS-Control n=5 and LLC-muHuR-KO n=6). **(a-e)**. The results are presented as mean  $\pm$  S.E.M. Source Data are provided in the Source Data File.

|                 | Total number of fibers counted |                |                |               |               |
|-----------------|--------------------------------|----------------|----------------|---------------|---------------|
|                 | Muscle                         | MyHC Type I    | MyHC Type IIA  | MyHC Type IIB | MyHC Type IIX |
| <b>Control</b>  | EDL                            | 1.53 ±0.50     | 22.66 ±2.26    | 75.81 ±2.60   | 22.97 ±1.95   |
|                 | PER                            | 5.84 ±0.51     | 33.31 ±1.87    | 60.85 ±2.30   | 23.42 ±1.79   |
|                 | SOL                            | 43.12 ±1.43    | 52.81 ±1.65    | 0.46 ±0.20    | 8.22 ±2.18    |
| <b>muHuR-OK</b> | EDL                            | 7.31 ±0.95***  | 17.81 ±1.67    | 74.88 ±2.38   | 21.01 ±1.22   |
|                 | PER                            | 12.76 ±1.99**  | 39.14 ±4.08    | 48.10 ±4.76*  | 26.65 ±3.29   |
|                 | SOL                            | 60.23 ±2.04*** | 36.75 ±1.59*** | 0.00 ±0.00*   | 15.08 ±1.62   |

Abbreviations: EDL (Extensor digitorum longus), PER (Peroneus), SOL (Soleus). Results are shown as mean ± S.E.M. \*p < 0.05, \*\*p < 0.005, \*\*\*p < 0.001

**Supplementary Table 1** Effect of HuR ablation on fiber type composition in *soleus* (SOL), EDL and *peroneus* (PER) muscles.

**Supplementary Table 2** Sequence of primers and siRNAs use in this study

| Methodology  | Targeted Gene                                                                        | Sequence                                                                                                      |
|--------------|--------------------------------------------------------------------------------------|---------------------------------------------------------------------------------------------------------------|
| <b>PCR</b>   | LoxP                                                                                 | Forward 5'-TGG TTA TGA AGA CCA CAT GGC GGA AGA-3'<br>Reverse 5'-AGC TTA GCA GGT ACC GTC TCC-3'.               |
|              | Cre                                                                                  | Forward 5'-CAT TTG GGC CAG CTA AAC AT-3'<br>Reverse 5'-CGG ATC ATC AGC TAC ACC AG-3'.                         |
|              | HuR exon 2                                                                           | Forward 5'-ATA TCA TGT TCC CAA CTC CC-3'<br>Reverse 5'-TGG CAC TCA CTG AAC TGG AA-3'.                         |
| <b>siRNA</b> | HuR                                                                                  | Sense: 5'- CAAACTCAGGAGCTTCTTTTTTGTATCATAAT-3'<br>Anti-sense: 5'- ATTATGATAAACAAAAAGAAGCTCCTGAGTTTG -3'       |
|              | CTL                                                                                  | Sense: 5'- TGTGTATTGTTTATTGTTTGTGTGTTGTTTGTAAA -3'<br>Anti-sense: 5'- TGTGTATTGTTTATTGTTTGTGTGTTGTTTGTAAA -3' |
|              | KSRP                                                                                 | Sense: 5'- CAAACTCAGGAGCTTCTTTTTTGTATCATAAT-3'<br>Anti-sense: 5'- ATTATGATAAACAAAAAGAAGCTCCTGAGTTTG -3'       |
| <b>qPCR</b>  | Tnn1                                                                                 | Forward 5'-GAA CAC GAG GAG CGA GAG G-3'<br>Reverse 5'-CCT TCA GCT TCA GGT CCT TG-3'.                          |
|              | Tnn2                                                                                 | Forward 5'-GGA GGG TGC GTA TGT CTG C-3'<br>Reverse 5'-GGG AAG TGG GCA GTT AGG AC-3'.                          |
|              | Tnnt1                                                                                | Forward 5'-GCC CAG GAG CTG TCA GAA T-3'<br>Reverse 5'-CTC CAC ACA GCA GGT CAT GT-3'.                          |
|              | Tnnt3                                                                                | Forward 5'-TGA TAT CAC CAC CCT CAG GA-3'<br>Reverse 5'-TCC TGA GTT CCC AAA GAT GC-3'.                         |
|              | MyHC I                                                                               | Forward 5'-CTC AAG CTG CTC AGC AAT CTA TTT-3'<br>Reverse 5'-GGA GCG CAA GTTTGT CAT AAG T -3'.                 |
|              | MyHC IIA                                                                             | Forward 5'-AGG CGG CTG AGG AGC ACG TA-3'<br>Reverse 5'-GCG GCA CAA GCA GCG TTG G-3'.                          |
|              | MyHC IIX                                                                             | Forward 5'-GAG GGA CAG TTC ATC GAT AGC AA-3'<br>Reverse 5'-GGG CCA ACT TGT CAT CTC TCA T -3'.                 |
|              | MyHC IIB                                                                             | Forward 5'-CAC CTG GAC GAT GCT CTC AGA-3'<br>Reverse 5'-GCT CTT GCT CGG CCA CTC T-3'.                         |
|              | Tfam                                                                                 | Forward 5'-CCA AAA AGA CCT CGT TCA GC-3'<br>Reverse 5'-CCA TCT GCT CTT CCC AAG AC-3'                          |
|              | PGC-1 $\alpha$                                                                       | Forward 5'-CAG GAA CAG CAG CAG AGA CA-3'<br>Reverse 5'-GTT AGG CCT GCA GTT CCA GA-3'.                         |
|              | PGC-1 $\beta$                                                                        | Forward 5'-GCC AGA AGC ACG GTT TTA TC-3'<br>Reverse 5'-ATC CAT GGC TTC GTA CTT GC-3'.                         |
|              | Six 1                                                                                | Forward 5'-AGG GAG AAA CGG GAG CTG-3'<br>Reverse 5'-GGG GGT GAG AAC TCC TCT TC-3'.                            |
|              | NCOA6                                                                                | Forward 5'-CCA TAG CCT CTG GAC AAA GC-3'<br>Reverse 5'-TGG ATT TTC GCT TGG AT-3'.                             |
|              | NFATc1                                                                               | Forward 5'-TGG AGA AGC AGA GCA CAG AC-3'<br>Reverse 5'-GCG GAA AGG TGG TAT CTC AA-3'.                         |
| Atrogin 1    | Forward 5'-GAC CGG CTA CTG TGG AAG AG-3'<br>Reverse 5'-CCA GGA GAG AAT GTG GCA GT-3' |                                                                                                               |

|               |                                                                                                |
|---------------|------------------------------------------------------------------------------------------------|
| Murf1         | Forward 5'-GAG CAA GGC TTT GAG AAC ATG GAC T-3'<br>Reverse 5'-GCG TCC AGA GCG TGT CTC ACT-3'.  |
| TPM1          | Forward 5'-TGC TTT TCT CCA ATT TGG TT-3'.<br>Reverse 5'-GGG CTG AGC TCT CAG AAG G-3'           |
| RPL32         | Forward 5'-TTC TTC CTC GGC GCT GCC TAC GA-3'<br>Reverse 5'-AAC CTT CTC CGC ACC CTG TTG TCA-3'. |
| GAPDH         | Forward 5'-AAG GTC ATC CCA GAG CTG AA-3'<br>Reverse 5'-AGG AGA CAA CCT GGT CCT CA-3'.          |
| NRF-1         | Forward 5'-CAGCACCTTTGGAGAATGTG-3'<br>Reverse 5'-CCTGGGTCATTTTGTCCACA-3'.                      |
| NRF-2         | Forward 5'-GATCCGCCAGCTACTCCCAGGTTG-3'<br>Reverse 5'-CAGGGCAAGCGACTCATGGTCATC-3'.              |
| MyoD          | Forward 5'-CGACACCGCCTACTACAGTG-3'<br>Reverse 5'-TTCTGTGTCGCTTAGGGATG-3'                       |
| Myogenin      | Forward 5'-CTACAGGCCTTGCTCAGCTC-3'<br>Reverse 5'-AGATTGTGGGCGTCTGTAGG-3'                       |
| UCP-2         | Forward 5'-TCTACAATGGGCTGGTCGC-3'<br>Reverse 5'-CAAGCGGAGAAAGGAAGGC-3'.                        |
| UCP-3         | Forward 5'-CCTACAGAACCATCGCCAGG-3'<br>Reverse 5'-ACCGGGGAGGCCACCACTGT-3'.                      |
| Acadv1        | Forward 5'-GGAGGACGACACTTTGCAGG-3'<br>Reverse 5'-AGCGAGCATACTGGGTATTAGA-3'.                    |
| CD36          | Forward 5'-GATGACGTGGCAAAGAACAG-3'<br>Reverse 5'-TCCTCGGGGTCCTGAGTTAT-3'.                      |
| FAS           | Forward 5'-AGAGATCCCGAGACGCTTCT-3'<br>Reverse 5'-GCCTGGTAGGCATTCTGTAGT-3'.                     |
| LDL           | Forward 5'-TGTGAATTTGGTGGCTGAAAAC-3'<br>Reverse 5'-AATAGGGAAGAAGATGGACAGGAAC-3'.               |
| ND1           | Forward 5'-CTAGCAGAAACAAACCGGGC-3'<br>Reverse 5'-CCGGCTGCGTATTCTACGTT-3'.                      |
| HK2           | Forward 5'-GCCAGCCTCTCCTGATTTTAGTGT-3'<br>Reverse 5'-GGGAACACAAAAGACCTCTTCTGG-3'.              |
| PPAR $\alpha$ | Forward 5'-GCGTACGGCAATGGCTTTAT-3'<br>Reverse 5'-ACAGAACGGCTTCCTCAGGTT-3'.                     |

**Supplementary Data 1** List of differentially expressed genes as analyzed by RNA-Seq in the *soleus* muscle from muHuR-KO and control mice ( $\log_2$  FC > 0.5 or < -0.5,  $p=0.05$ ) (See attached Excel File). The raw RNASeq data have been deposited into NCBI Gene Expression Omnibus (GEO) data base under accession number GSE134241.
